# Supplementary material for: An Electrochemical Sensor Based on Gold Nanodendrite/Surfactant Modified Electrode for Bisphenol A Detection
Source: Hindawi journal article supplement (doi:10.1155/2020/6693595), 2020-12-29
Supplement: f1 [file 6693595.f1.pdf]

# An Electrochemical Sensor Based on Gold Nanodendrite/Surfactant Modified Electrode for Bisphenol A Detection

Nguyen Thi Lien<sup>1</sup>, Le Quoc Hung<sup>2</sup>, Nguyen Tien Hoang<sup>3</sup>, Vu Thi Thu<sup>3</sup>, Dau Thi Ngoc Nga<sup>3</sup>,  
Pham Thi Hai Yen<sup>2</sup>, Pham Hong Phong<sup>2</sup> and Vu Thi Thu Ha<sup>2,3,\*</sup>

<sup>1</sup>Department of Chemistry, Hanoi University of Science, 19 Le Thanh Tong, Hanoi, Vietnam.

<sup>2</sup>Institute of Chemistry, Vietnam Academy of Science and Technology, 18 Hoang Quoc Viet, Cau Giay, Hanoi, Vietnam.

<sup>3</sup>University of Science and Technology of Hanoi, Vietnam Academy of Science and Technology, 18 Hoang Quoc Viet, Cau Giay, Hanoi, Vietnam.

Corresponding author: [havt@ich.vast.vn](mailto:havt@ich.vast.vn)

(Supplementary Information)

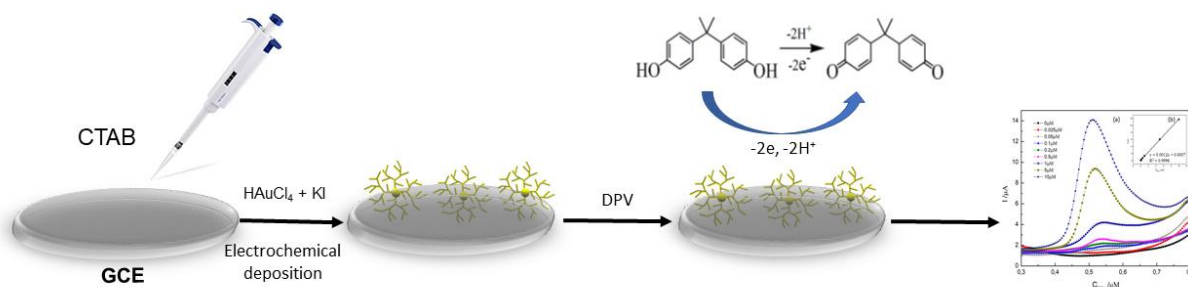

Graphical abstract

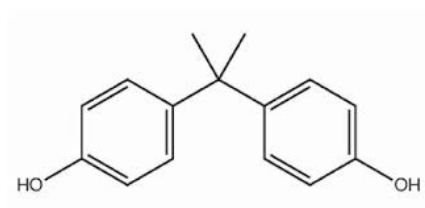

Fig. S1: Structure of studied compound

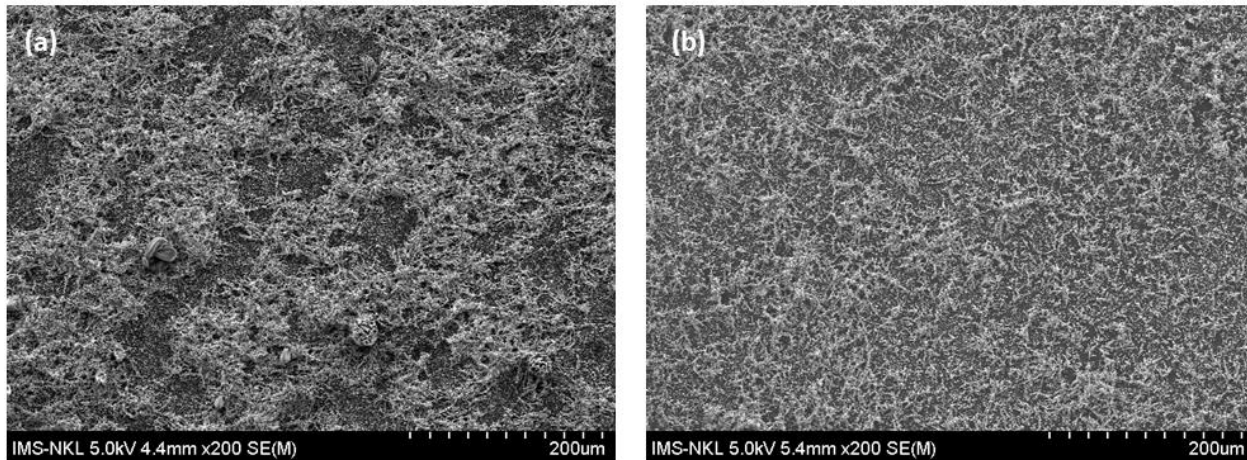

Fig. S2: SEM images of AuNDs created on GCE without (a) and with CTAB layer

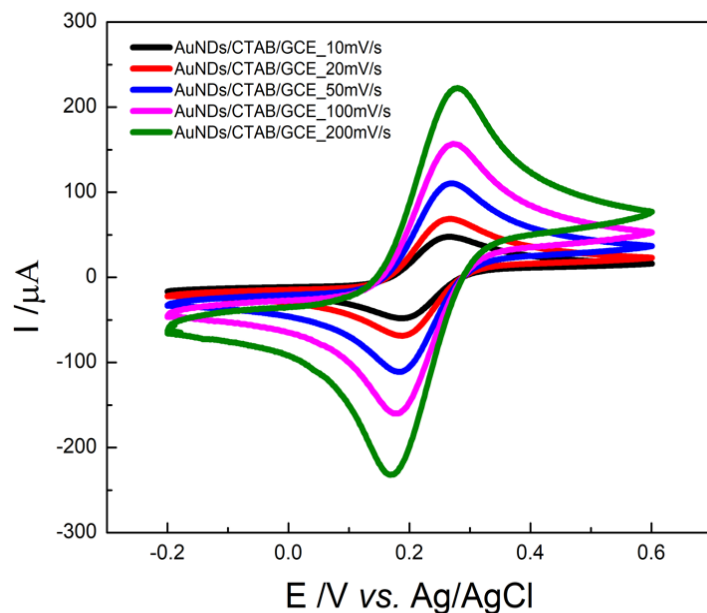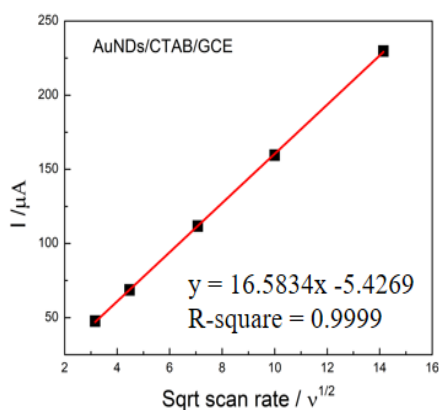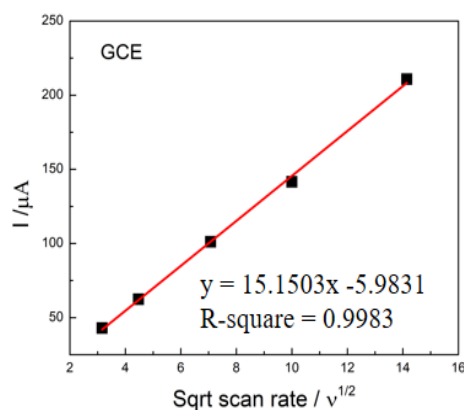

Randle – Sevcik equation:

$$I_p = (2.69 \times 10^5) n^{3/2} A C D^{1/2} v^{1/2}$$

$A$  is the active surface area (ECSA) ( $cm^2$ )

$D$  is the diffusion coefficient of  $[K_3Fe(CN)_6]$  ( $6.605 \times 10^{-6} cm^2 s^{-1}$ )

$n = 1$  is the number of transferred electrons for  $[Fe(CN)_6]^{3-/4-}$  redox couple

$C$  is the bulk concentration of  $[K_3Fe(CN)_6]$  (5 mM)

Fig. S3. CVs of AuNDs/CTAB/GCE in 5 mM  $K_3Fe(CN)_6/K_4Fe(CN)_6$  + 0.2 M PBS at different scan rates and used for calculation of electroactive surface area (ECSA)

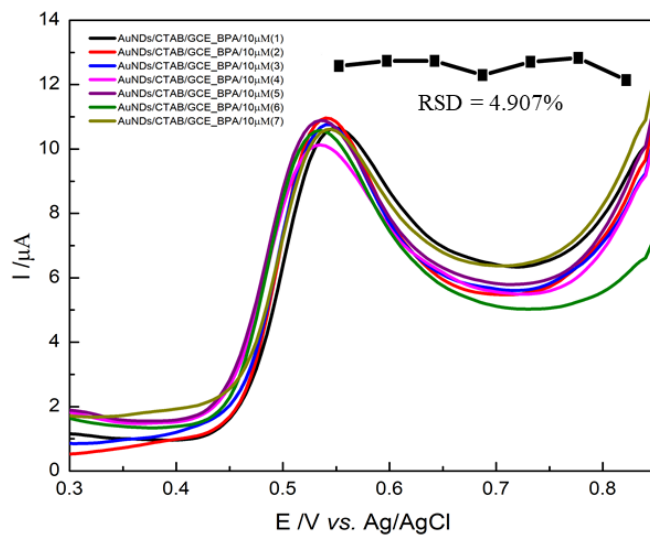

Fig. S4. Reproducibility of seven AuNDs/CTAB/GCE sensors at 10  $\mu\text{M}$  BPA in PBS pH 7

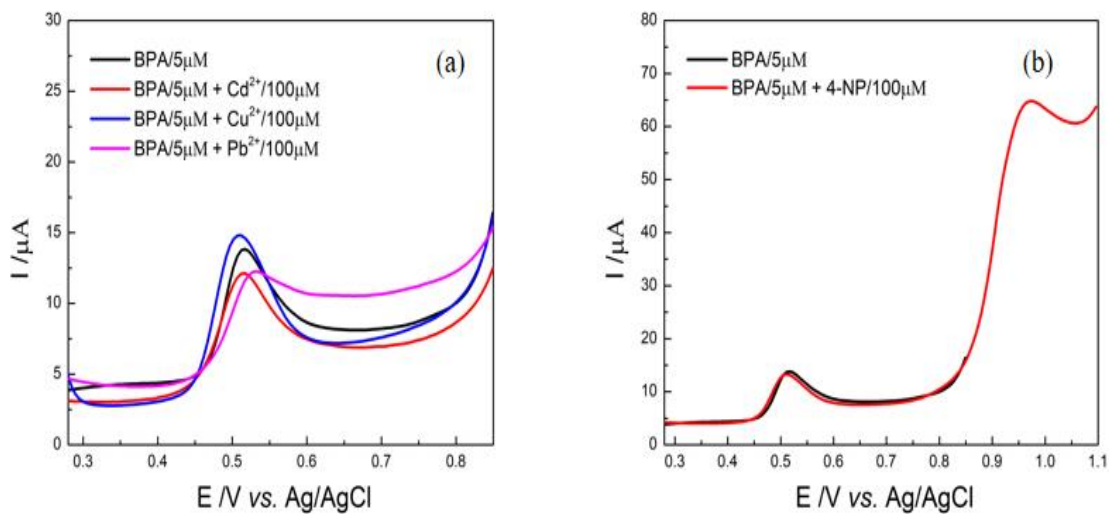

Fig. S5. Voltammograms of BPA 5  $\mu\text{M}$  on AuNDs/CTAB/GCE before and after adding interferents at concentrations 20 times higher than that of analyte, BPA with  $\text{Cd}^{2+}$ ,  $\text{Pb}^{2+}$ ,  $\text{Cu}^{2+}$  (a) and with 4-nitrophenol (b)

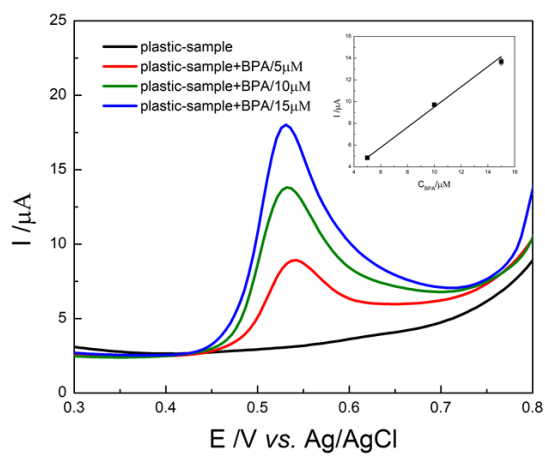

(a)

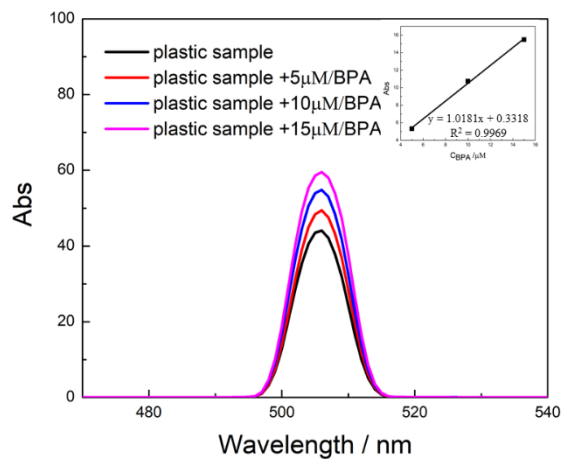

(b)

Fig. S6. Voltammograms of solution extracted from plastic drinking water bottle spiked BPA at different concentrations recorded on AuNDs/CTAB/GCE sensor (a) and by fluorescence method (b)
